# Supplementary material
Source: MDPI journal article supplement (https://www.mdpi.com/2073-445X/12/2/388)
Supplement: s1 [file s1]

Archive with 5 entries (5 files):
- SupplTableS1.pdf
- SupplTableS2.pdf
- SupplTableS3.pdf
- SupplTableS4.pdf
- SupplTableS5.pdf
