# Supplementary material
Source: MDPI journal article supplement (https://www.mdpi.com/2073-445X/12/2/388)
Supplement: s1 [file s1 › SupplTableS1.pdf]

Supplementary Table S1. Soil section 1 of the Kamyane-Zavallia site (Figure 3-4)

| Index                    | Depth, m   | Description                                                                                                                                                                                                                                                                                                                                                                     | Thin-section                                                                                                                                                                                                                                                                                                                                                                                                                                                                                                                                                                                                                                                             | Reference to micro-photo |
|--------------------------|------------|---------------------------------------------------------------------------------------------------------------------------------------------------------------------------------------------------------------------------------------------------------------------------------------------------------------------------------------------------------------------------------|--------------------------------------------------------------------------------------------------------------------------------------------------------------------------------------------------------------------------------------------------------------------------------------------------------------------------------------------------------------------------------------------------------------------------------------------------------------------------------------------------------------------------------------------------------------------------------------------------------------------------------------------------------------------------|--------------------------|
| H (arable)               | 0.0 – 0.3  | dark-grey, blackish-light loam. It is very loose in the upper 10 cm, with a granular-blocky structure, and without visible carbonates. Some krotovinas (D 5-6 cm) filled with dark and mixed material and corn roots cut this horizon.                                                                                                                                          | The thin section of the sample taken from 0.1-0.2 m depth yielded a light-grey substance of spongy texture with primary humic-clayish micro-aggregates (worms' excrement, D 0.02-0.04 mm). Micro-aggregates of the lower order are united in complex (up to IV order) structures of circular or oval shape, sometimes including grains of sand. The network of inter and inner- aggregate pores is well developed. The grains of the mineral skeleton are packed loosely. There are grains of sand (D 0.06-0.2 mm), but primarily the sample consists of medium and large quartz grains of silt. Humus of mull type colored the background, which is weakly anisotropic. | Figure 4, a-r            |
| Hpk (under arable layer) | 0.3-0.5    | dark-grey or blackish-light loam. It is much denser than the upper horizon. It has a granular-blocky structure with large stable aggregates. The soil does not boil with HCl (10%). It is cut by some krotovinas (d 5-7 cm) and rare long vegetation roots. The contact with the underlying horizon is smooth and is marked by low-intensity boiling on contact with HCl (10%). | In thin-section, the sample from 0.3-0.4 m depth reveals that spongy grey matter consists of primary micro-aggregates (0.02-0.04 mm) collided into larger aggregates of II-IV order separated by a system of wavy outer and inner channels and pores. Sand grains are united in larger micro-aggregates. Grains of the mineral skeleton with humus and clayish shells took over half of the thin section. They consist of rounded sand grains (D 0.05-0.2 mm) and medium and large silt.                                                                                                                                                                                 | Figure 4 е-и             |
| Hp(k)                    | 0,5-0,85 m | dark-grey, blackish-light loam. It is rather loose with a granular-blocky structure and without visible carbonates. It reacts with HCl. The reaction is intense from a depth of -0.6 m. It is getting lighter with depth. The contact with the underlying layer is smooth and visible by a slight change in the color of sediments.                                             | In thin-section, the sample 0.5-0.6 cm deep contains more sand and has remarkably lighter color. The material is loose, with the evident presence of humus: every sand grain (D 0.05-0.1 mm) has a shell of humus and clay.                                                                                                                                                                                                                                                                                                                                                                                                                                              | Figure 4 к-м             |
| Phk                      | 0.85-1.2   | grey, yellowish in the lower part, loose light loam. It reacts actively with HCl and contains many krotovinas with mixed material.                                                                                                                                                                                                                                              | In thin-section, the sample (0.9-1.0 m deep) is light-grey, with a spongy, weakly anisotropic structure done of simple primary micro-aggregates (D 0.02-0.04) as well as of complex (II-IV order) micro-aggregates (D up to 0.3 mm). Moreover, a new type appeared, namely carbonate-clayish micro-aggregates with flat                                                                                                                                                                                                                                                                                                                                                  | Figure 4 н-т             |

| Index | Depth, m | Description                                                                                                                                                                                                                                       | Thin-section                                                                                                                                                                                                                                                                                                                                                                                                                                                                                                            | Reference to micro-photo |
|-------|----------|---------------------------------------------------------------------------------------------------------------------------------------------------------------------------------------------------------------------------------------------------|-------------------------------------------------------------------------------------------------------------------------------------------------------------------------------------------------------------------------------------------------------------------------------------------------------------------------------------------------------------------------------------------------------------------------------------------------------------------------------------------------------------------------|--------------------------|
|       |          |                                                                                                                                                                                                                                                   | relief resembling nodule contractions. The mass is filled with microcrystalline calcite. Every visible grain of primary minerals has a carbonate-clayish shell. There are sand grains (d 0.05-0.2 mm) and medium and large silt .                                                                                                                                                                                                                                                                                       |                          |
| Pk    | 1.2-1.6  | yellow, light yellow in its lower part, loose, light loam with micellar carbonates. It is cut by many krotovinas and contains cameras of burrowing animals 20 cm in diameter. It has a blocky structure. The soil reacts actively with HCl (10%). | In thin-section, the sample (1.3-1.4 m deep) is light yellow, with a spongy texture and loosely packed grains of mineral skeleton against carbonate – clayish background, with loess particles. The thin section is filled with microcrystalline calcite. There are also larger crystals of CaCO <sub>3</sub> . The massive carbonate content leads to large carbonate–clayish nodule contractions (d 0.05 – 0.15 mm). The material is anisotropic. The material resembles the known microscopic descriptions of loess. | Figure 4. y-III          |
