# Supplementary material
Source: MDPI journal article supplement (https://www.mdpi.com/2073-445X/12/2/388)
Supplement: s1 [file s1 › SupplTableS2.pdf]

Supplementary Table S2. Mohylna 3. Section 1., Figure 14.

| Index                               | Depth, m       | Description                                                                                                                  | Samples: granulometry and organic content |
|-------------------------------------|----------------|------------------------------------------------------------------------------------------------------------------------------|-------------------------------------------|
| Upper soil (layers 5-6) – 0.0-0.4 m |                |                                                                                                                              |                                           |
| Hd topsoil                          | 0.0-0.1        | a blackish, loose granular-blocky clay loam                                                                                  |                                           |
| H                                   | 0.2-0.4        | a humus horizon, granular-blocky clay loam                                                                                   | 0.1-0.2m<br>0.3-0.4 m                     |
| Middle soil (layer 4) – 0.4-0.8 m   |                |                                                                                                                              |                                           |
| Hpk                                 | 0.4-0.55       | a humic-transitional horizon, dark-grey, loose, granular-blocky clay loam with micellar carbonates                           | 0.45-0.55 m                               |
| Phk                                 | 0.55-0.75      | a grey, granular-blocky clay loam with micellar carbonates                                                                   | 0.65-0.75 m                               |
| Transitional layer                  |                |                                                                                                                              |                                           |
| Pk                                  | 0.75-0.8       | a brownish, dense, clay loam cemented with carbonates                                                                        | 0.75-0.8 m                                |
| Lower soil                          |                |                                                                                                                              |                                           |
| H(p)k                               | 0.8-1.05       | an unevenly colored, brownish, grey with brown spots clay loam, less humic than the horizons above, with micellar carbonates | 0.8-0.9 m<br>0.9-1.0 m                    |
| Hpk                                 | 1.05-1.4       | a humic-transitional horizon, grey-brown clay loam, with micellar carbonates                                                 | 1.1-1.2 m<br>1.3-1.4 m                    |
| Phk                                 | 1.4-1.7        | a horizon transitional to bedrock; grey – light grey, clay loam with many carbonates                                         | 1.4-1.5 m<br>1.6-1.7 m                    |
| Pk                                  | 1.7 and lower. | well-sorted, pale-white loess of Buh age or earlier. Visible till 2.5 m in the natural section by the riverbank              | 1.8-1.9 m                                 |
