# Supplementary material
Source: MDPI journal article supplement (https://www.mdpi.com/2073-445X/12/2/388)
Supplement: s1 [file s1 › SupplTableS3.pdf]

Supplementary Table S3. The soil section 3. Kamyane-Zavallia 1 (Figure 8-9)

| Index      | Depth, m                | Description                                                                                                                                                      | Thin sections                                                                                                                                                                                                                                                                                                                                                                                                                                                                                                                                                                                                                                               | Reference to micro-photo         |
|------------|-------------------------|------------------------------------------------------------------------------------------------------------------------------------------------------------------|-------------------------------------------------------------------------------------------------------------------------------------------------------------------------------------------------------------------------------------------------------------------------------------------------------------------------------------------------------------------------------------------------------------------------------------------------------------------------------------------------------------------------------------------------------------------------------------------------------------------------------------------------------------|----------------------------------|
| H (arable) | 0.0 – 0.2               | dark grey with a brownish tint, dense, sandy loam with blocky structure. It contains no carbonates.                                                              | The sample (0.1-0.2 m deep) in the thin section yielded the following picture. The primary micro-aggregates (d 0.02-0.04 mm) are poorly defined. There are also grains of large silt with humic–clayish shells. The matter is very loose. Organic matter is organized into light concretions and darker concretions of humus with flat relief, rounded concretions of organic-clayish composition (up to 0.5 mm in D), and nodule concretions (d 0.07 mm). The mineral skeleton comprises rounded sand grains of quartz (D 0.05-0.3 mm), hornblende, zoisite, and calcite. The anisotropic background is barely touched by humus .                          | Figure 9 а-г                     |
| Hp         | 0.3 – 0.6               | this horizon is darker and denser than the upper horizon. It is dark grey blocky carbonate-less sandy clay loam, with many krotovinas filled with mixed material | 1. In thin-section, the sample (0.3-0.4 m) is colored by humus unevenly. It is grey with a loose spongy texture. The isotropic concretions and humus pieces are visible, while complex micro-aggregates are degraded. The mineral skeleton comprises mostly small sand grains with the presence of large and medium silt. The grains have humic–clayish shells.<br>2. In a thin section, the second sample of this horizon (0.5-0.6 m deep) yielded complex micro-aggregates built upon concretions and clots of humus. The mineral skeleton comprises sand grains (0.05-0.2 mm), mostly of quartz with humic–clayish shells. Some shells are ferruginated. | Figure 9 д-з<br><br>Figure 9 и-к |
| Ph         | 0.6-0.7                 | brownish grey blocky sandy loam with tongues of humus. Many krotovinas cut it.                                                                                   | In the thin-section, the sample (0.6-0.7 m) is pale. Sand grains (D 0.05-0.15 mm) are loosely packed with clots of organic-clayish matter in-between. .                                                                                                                                                                                                                                                                                                                                                                                                                                                                                                     | Figure 9 л, м                    |
| P          | 0.7- traced till<br>1.2 | a pale yellow sandy loam with thin tongues of humic material                                                                                                     | The sample (0.8-0.9 m deep) in thin-section demonstrates light silty loam, with grains divided by wavy pores. It comprises carbonate-clayish clots. There are grains 0.05-0.15 mm in size without shells, with rare micro-aggregates.                                                                                                                                                                                                                                                                                                                                                                                                                       | Figure 9 н-п                     |
