# Supplementary material
Source: MDPI journal article supplement (https://www.mdpi.com/2073-445X/12/2/388)
Supplement: s1 [file s1 › SupplTableS5.pdf]

Supplementary Table S5. Mykolyna Broiaka. Section 1., Figure 14.

| Index | Depth, m                | Description                                                                                                                                                  | Samples, Organic content, granulometry |
|-------|-------------------------|--------------------------------------------------------------------------------------------------------------------------------------------------------------|----------------------------------------|
| H     | 0.0-0.1                 | blackish blocky loose clay loam                                                                                                                              |                                        |
| Hp    | 0.1-0.2                 | dark-grey, loose, blocky clay loam                                                                                                                           | 0.1-0.2 m                              |
| Hpk   | 0.2-0.5                 | dark-grey sandy clay loam                                                                                                                                    |                                        |
| II    | 0.5-0.55                | grey dusty sandy light clay loam, visibly lighter than upper and lower horizons                                                                              |                                        |
| III   | 0.55-0.75               | Blackish dusty light clay loam, loose with many krotovinas                                                                                                   |                                        |
| IV    | 0.75-0.77               | Light horizon similar to II                                                                                                                                  |                                        |
| V     | 0.77-1.0                | Blackish clay loam, denser in texture than horizon III                                                                                                       |                                        |
| VI    | 1.0-1.01                | Sandy light horizon                                                                                                                                          |                                        |
| VII   | 1.01-1.3                | Dark-grey clay loam, very viscous when wet                                                                                                                   |                                        |
| VIII  | 1.3-1.32                | Brown - grey horizon with striped pattern of colouring                                                                                                       |                                        |
| IX    | 1.32-1.9                | Blackish heavy humus-rich clay loam, very viscous, evidently of marshy origin, contained a lense of freshwater gastropods in the lower part (1.8-1.9 m deep) | 1.82-1.9 m                             |
| X     | 1.9 – traced till 2.2 m | Viscous, marshy alevrite heavy clay loam                                                                                                                     | 2.07-2.17 m<br>2.0-2.1 m               |
